# Supplementary material
Source: publisher figshare collection journal article supplement (https://acs.figshare.com/ndownloader/files/9547360)
Supplement: Supplementary file 1 [file 9547360]

# Two-way reversible shape memory polymers made of co-crystallizable random copolymers with tunable actuation temperatures

Kaojin Wang, Yong-Guang Jia, X.X. Zhu\*

Département de Chimie, Université de Montréal,  
C.P. 6128, Succ. Centre-ville, Montréal, QC, H3C 3J7, Canada

## Supporting Information

**Scheme S1. Synthesis of the Prepolymers through Enzymatic Polymerization.**

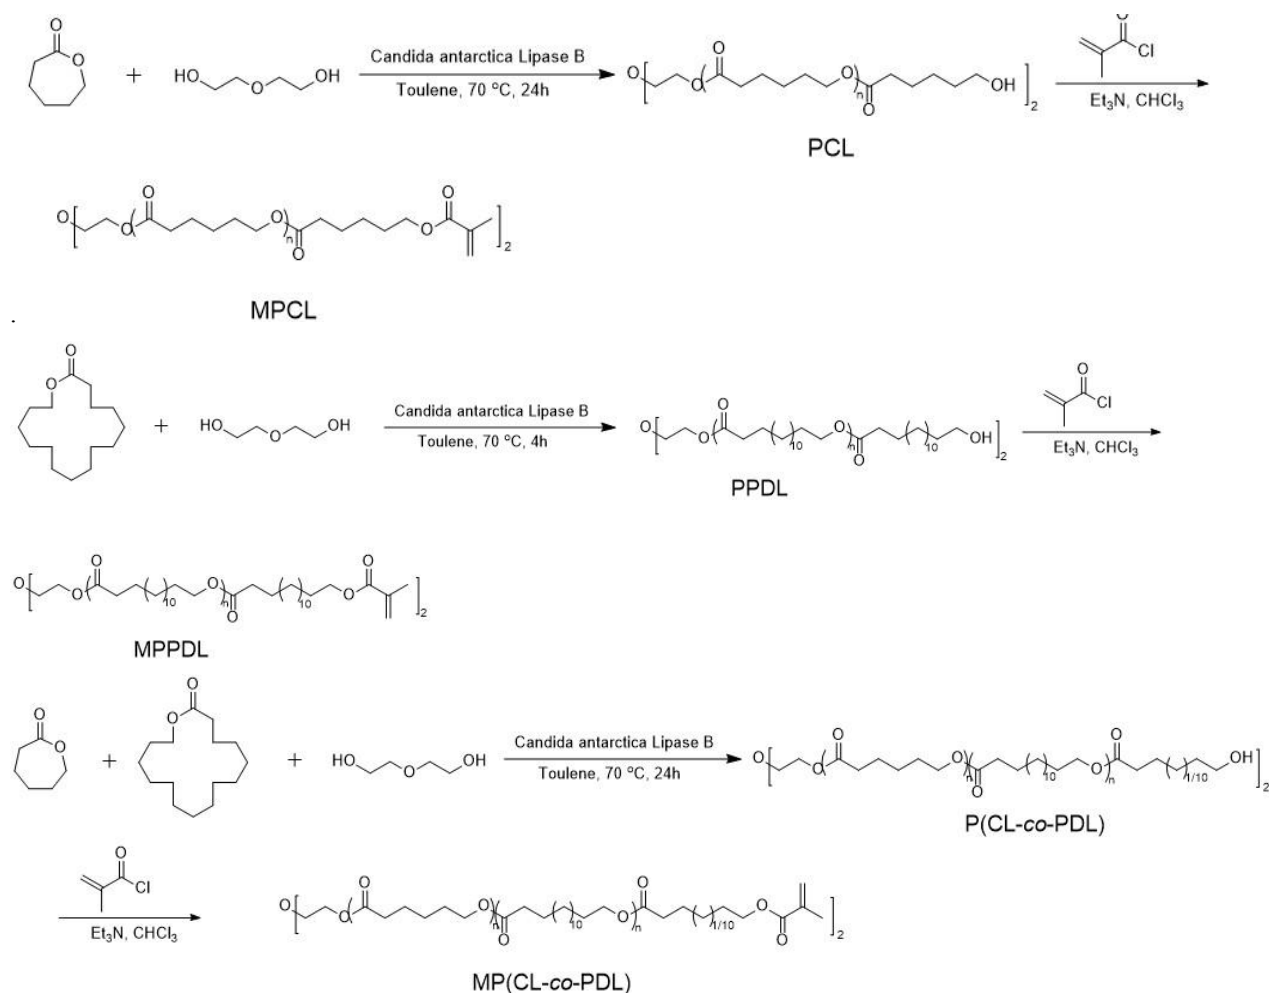

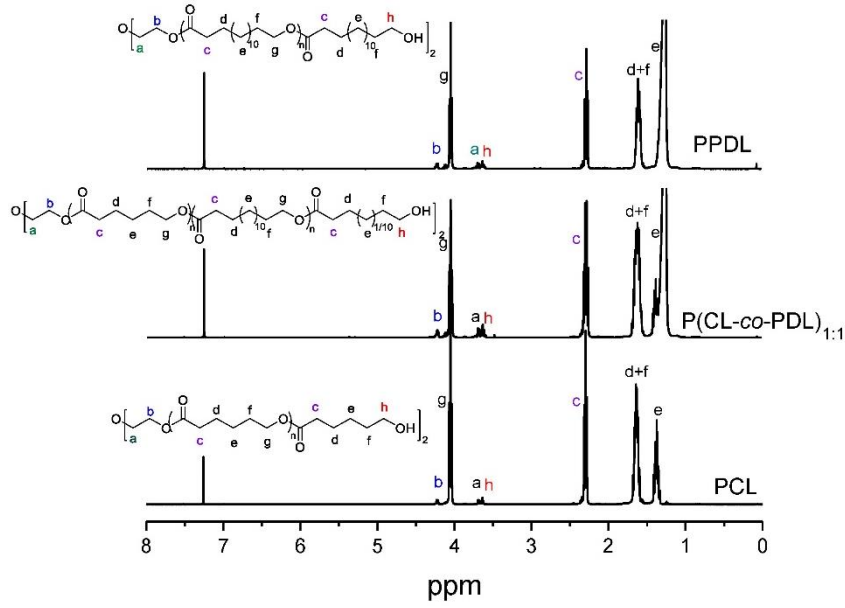

**Figure S1.**  $^1\text{H}$  NMR spectra of prepolymers. Peaks a and h cannot be separated due to their overlap.

Eqs S1-S3 are used to calculate the number-average molecular weight of the prepolymers:

$$\text{DP} = \frac{I_c}{I_{a+h}} \times 4 \quad (\text{S1})$$

$$M_{n,\text{NMR}} = \text{DP} \times (M_{\text{CL}} x_{\text{CL}} + M_{\text{PDL}} (1 - x_{\text{CL}})) + M_{\text{In}} \quad (\text{S2})$$

$$x_{\text{CL}} = \frac{10I_c - I_e}{9I_c} \quad (\text{S3})$$

where DP is the degree of polymerization of the prepolymers,  $I$  is the integration area of peak,  $M_{\text{CL}}$  and  $M_{\text{PDL}}$  indicate molecular weight of the repeating unit, CL and PDL, respectively,  $x_{\text{CL}}$  is the molar fraction of CL in the copolymer,  $1 - x_{\text{CL}}$  equals to the molar fraction of PDL, while  $M_{\text{In}}$  denotes molecular weight of initiator (diethylene glycol).

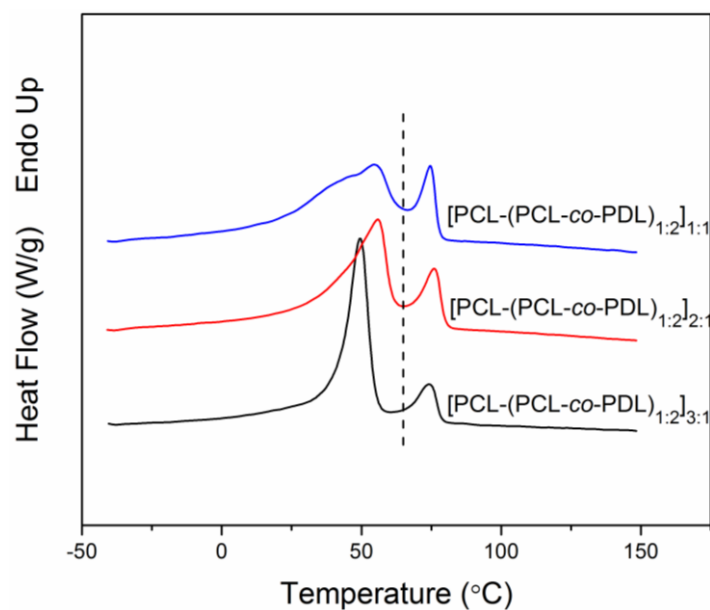

**Figure S2.** DSC heating traces of thiol-ene cross-linked polymer networks with various weight ratios of prepolymers PCL to (PCL-co-PDL)<sub>1:2</sub>.

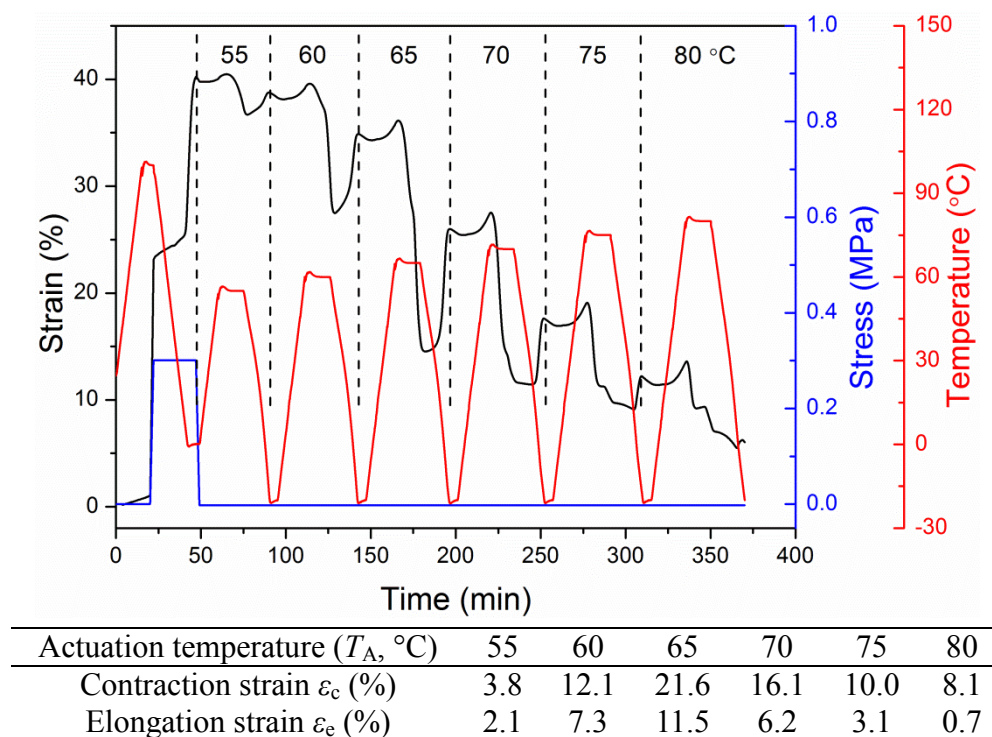

**Figure S3.** 2W-SME under stress-free condition at various temperatures. The largest values of both contraction and elongation strains are obtained at 65°C, which is selected as the optimal actuation temperature.

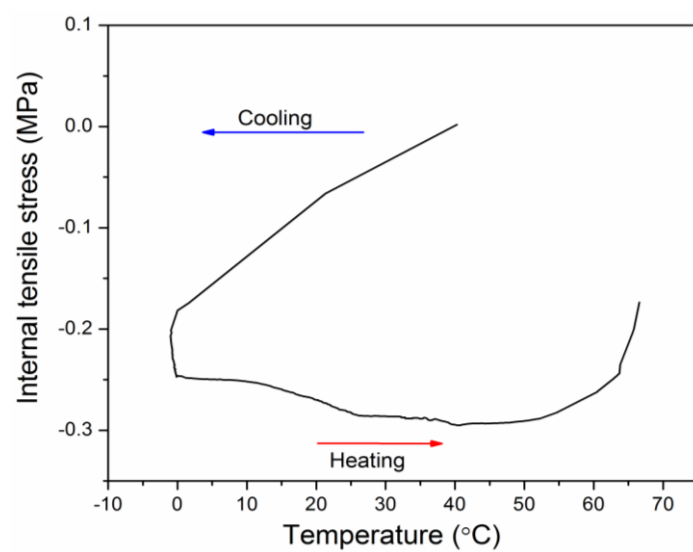

**Figure S4.** Internal tensile stress of 2W-SME under stress-free condition for the  $\text{CC}_1\text{D}_2$  polymer network.
